# Supplementary material for: Murine double minute 2 aggravates adipose tissue dysfunction through ubiquitin-mediated six-transmembrane epithelial antigen of prostate 4 degradation
Source: PubMed Central journal article supplement (PMC9209722; doi:10.1016/j.isci.2022.104544), 2022-06-07
Supplement: mmc1.pdf [file mmc1.pdf]

**Supplemental information**

**Murine double minute 2 aggravates adipose tissue  
dysfunction through ubiquitin-mediated  
six-transmembrane epithelial antigen  
of prostate 4 degradation**

**Wei Zhao, Qiang Xu, Jiahui Yang, Xianghong Xie, Chunmei Li, Weihong Zhang, Enhui Chen, Yanfang Guo, Mingyue Gao, Jie Shi, Huabing Zhang, Hong Yao, Meixia Li, Li Yan, Fude Fang, Wenming Wu, and Xiaojun Liu**

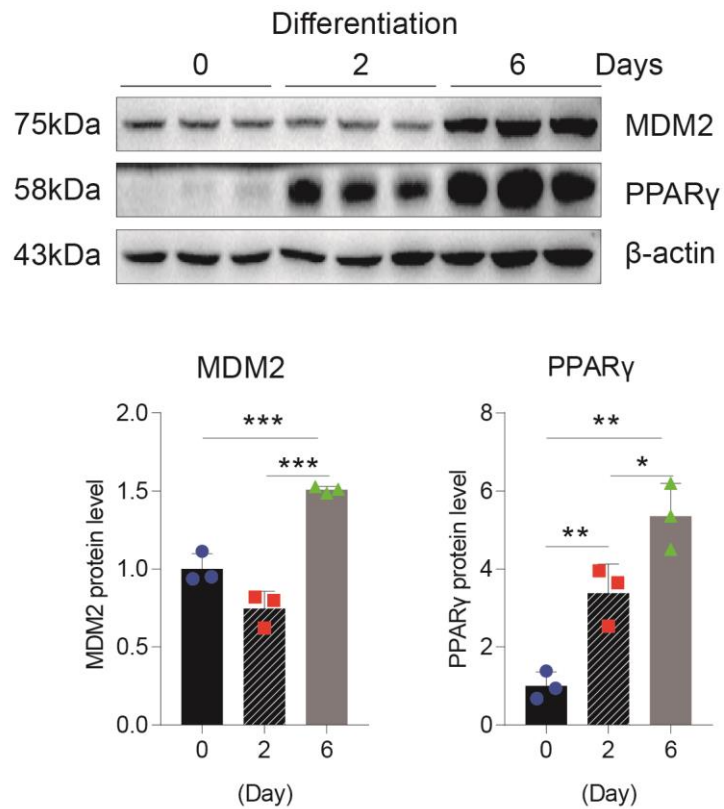

**Figure S1. The MDM2 expression is increased with the maturity of adipocyte differentiation. Related to Figure 1.**

Western blotting (up) and gray density (down) of MDM2 expression in SVF cells differentiation 0 day, 2 days and 6 days.  $n = 3$ . Data are represented as means  $\pm$  SD. Statistical analysis was carried out by one-way ANOVA. \*  $p < 0.05$ , \*\*  $p < 0.01$  and \*\*\*  $p < 0.001$ .

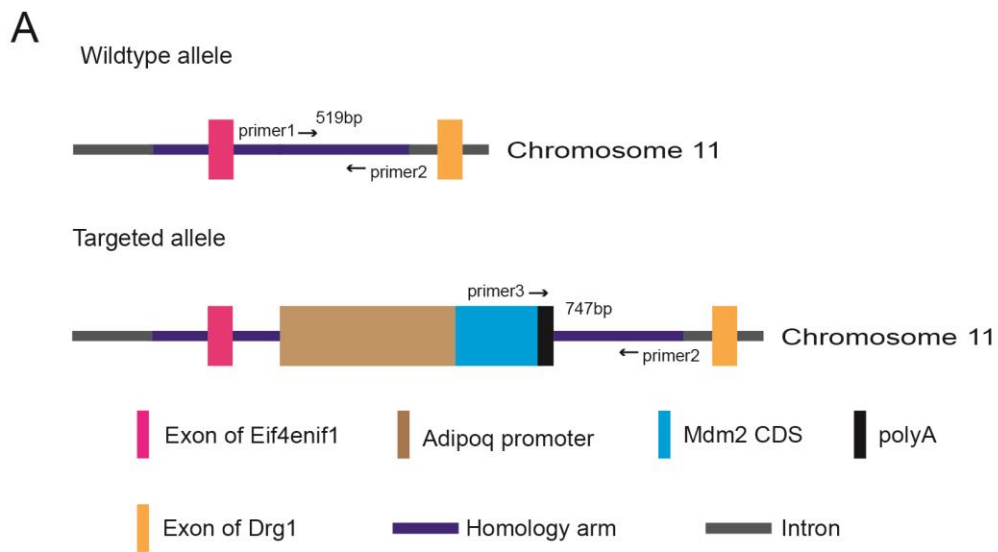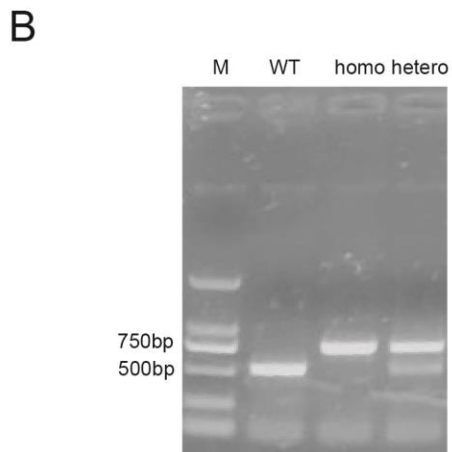

**Figure S2. Creation of adipocyte-specific knock-in *Mdm2* mice. Related to Figure 2.**

(A) Schematic diagram for the creation of adipocyte-specific knock-in *Mdm2* (*Mdm2*-AKI) mice.

(B) Identification of *Mdm2*-AKI mouse genotype.

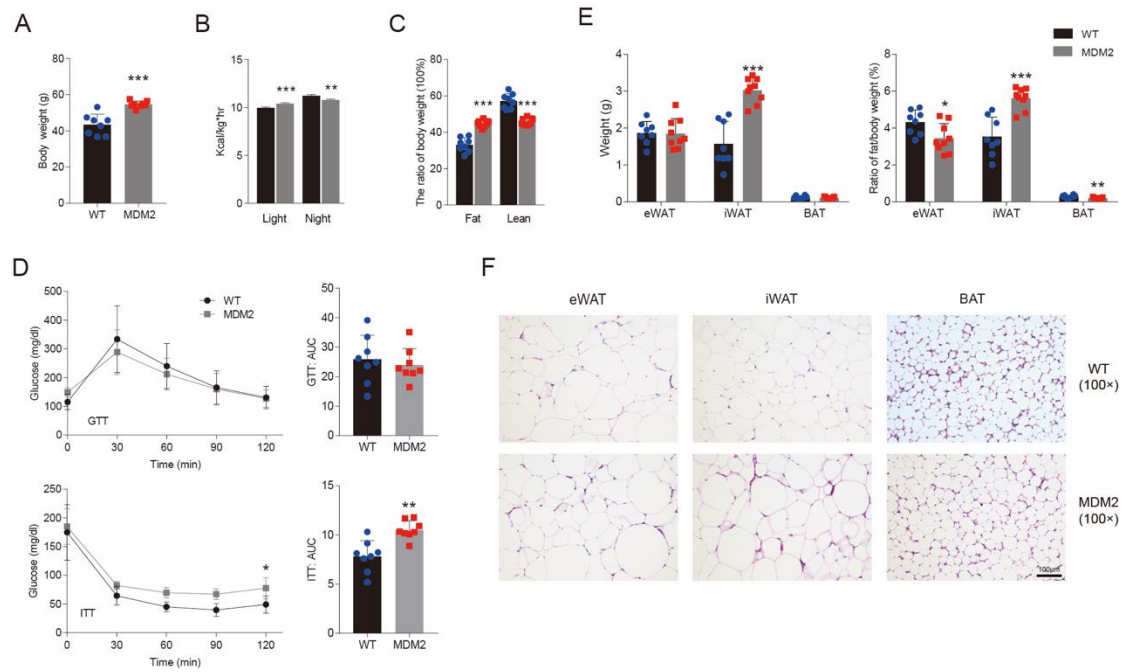

**Figure S3. Adipose-specific MDM2 overexpression aggravates HFD-induced energy expenditure decrease and insulin resistance. Related to Figure 3.**

(A) Body weight of WAT in WT and *Mdm2*-AKI mice on a HFD for 8 months (B).  $n = 8/\text{group}$ . Data are represented as mean  $\pm$  SD. Statistical analysis was carried out by Student's t test. \*\*\*  $p < 0.001$ .

(B) Heat production of WT and *Mdm2*-AKI mice on a HFD for 8 months was measured by CLAMS.  $n = 8/\text{group}$ . Data are represented as mean  $\pm$  SEM. Statistical analysis was carried out by Student's t test. \*\*  $p < 0.01$  and \*\*\*  $p < 0.001$ .

(C) Fat and lean mass of WT and *Mdm2*-AKI mice on a HFD for 8 months were determined by noninvasive EchoMRI.  $n = 8/\text{group}$ . Data are represented as mean  $\pm$  SD. Statistical analysis was carried out by Student's t test. \*\*\*  $p < 0.001$ .

(D) GTT (up), ITT (down) and area under the curve (AUC) of WT and *Mdm2*-AKI mice on a HFD for 8 months were analyzed.  $n = 8/\text{group}$ . Data are represented as mean  $\pm$  SD. Statistical analysis was carried out by two-way ANOVA for GTT and ITT, and Student's t test for AUC. \*  $p < 0.05$  and \*\*  $p < 0.01$ .

(E) Weight (left) and ratio (right) of fat weight/body weight of WAT in WT and *Mdm2*-AKI mice on a HFD for 8 months.  $n = 8/\text{group}$ . Data are represented as mean  $\pm$  SD. Statistical analysis was carried out by one-way ANOVA. \*  $p < 0.05$ , \*\*  $p < 0.01$  and \*\*\*  $p < 0.001$ .

(F) H&E staining of WAT and BAT of WT and *Mdm2*-AKI mice on a HFD for 8 months. Scale bars, 100  $\mu\text{m}$ .

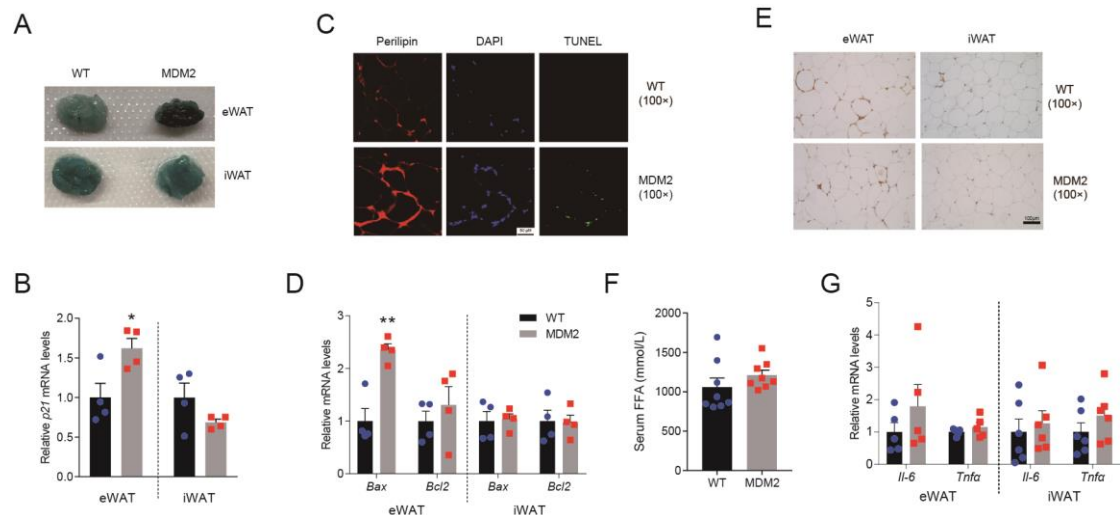

**Figure S4. MDM2 overexpression in adipose tissues increases HFD-induced eWAT dysfunction. Related to Figure 4.**

(A) Senescence  $\beta$ -galactosidase staining in WAT of WT and *Mdm2*-AKI mice on a HFD for 8 months.

(B) Relative mRNA levels of *p21* in WAT of WT and *Mdm2*-AKI mice on a HFD for 8 months, relative to  $\beta$ -actin. Data are represented as mean  $\pm$  SEM. Statistical analysis was carried out by Student's t test. \*\*  $p < 0.01$ .

(C) Representative immunofluorescence staining of TUNEL (green) in eWAT of WT and *Mdm2*-AKI mice on a HFD for 8 months. Scale bars, 50  $\mu$ m.

(D) Relative mRNA levels of *Bax* and *Bcl2* in WAT of WT and *Mdm2*-AKI mice on a HFD for 8 months, relative to  $\beta$ -actin. Data are represented as mean  $\pm$  SEM. Statistical analysis was carried out by Student's t test. \*\*  $p < 0.01$ .

(E) F4/80 antigen positivity in WAT of WT and *Mdm2*-AKI mice on a HFD for 8 months. Scale bars, 100  $\mu$ m.

(F) Biochemical analysis of serum FFA in WT and *Mdm2*-AKI mice on a HFD for 8 months. Data are represented as mean  $\pm$  SD. Statistical analysis was carried out by Student's t test.

(G) Relative mRNA levels of *Tnfa* and *Il-6* in WAT of WT and *Mdm2*-AKI mice on a HFD for 8 months, relative to  $\beta$ -actin. Data are represented as mean  $\pm$  SEM. Statistical analysis was carried out by Student's t test.

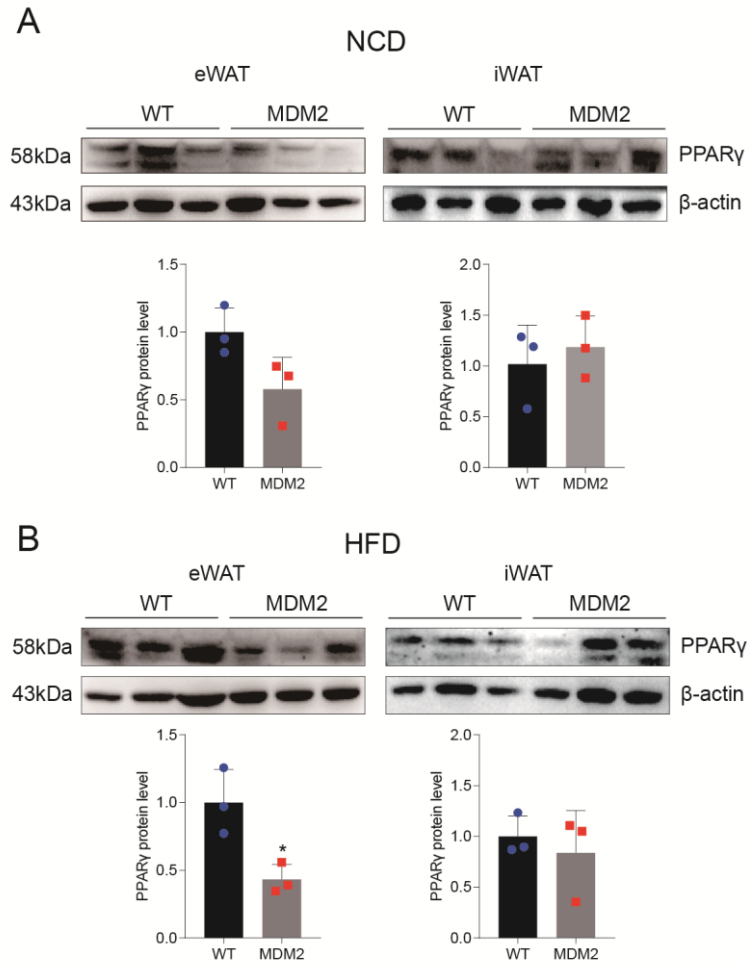

**Figure S5. Western blotting (up) and protein gray value (down) of PPAR $\gamma$  in WAT of WT and *Mdm2*-AKI mice on a NCD for 8 weeks (A) and on a HFD for 12 weeks(B). Related to Figure 4.**

n = 3/group. Data are represented as mean  $\pm$  SD. Statistical analysis was carried out by Student's t test. \* p < 0.05.

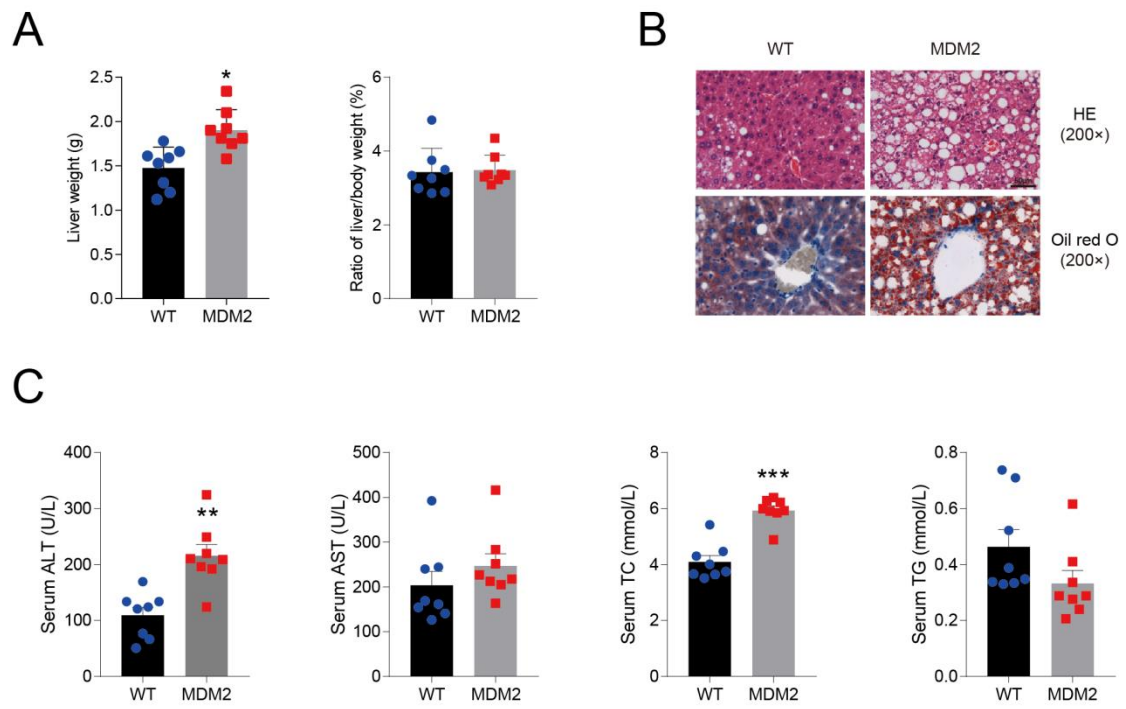

**Figure S6. MDM2 overexpression in adipose tissues aggravates HFD-induced hepatic steatosis. Related to Figure 5.**

(A) Liver weight (left) and ratio of liver weight/body weight (right) in WT and *Mdm2*-AKI mice on HFD for 8 months.  $n = 8/\text{group}$ . Data are represented as mean  $\pm$  SD. Statistical analysis was carried out by Student's t test. \*  $p < 0.05$ .

(B) H&E (up) and oil red O staining (down) of livers of WT and *Mdm2*-AKI mice on a HFD for 8 months. Scale bars, 50  $\mu\text{m}$ .

(C) Biochemical analysis of serum in WT and *Mdm2*-AKI mice on a HFD for 8 months.  $n = 8/\text{group}$ . Data are represented as mean  $\pm$  SD. Statistical analysis was carried out by Student's t test. \*\*  $p < 0.01$  and \*\*\*  $p < 0.001$ .

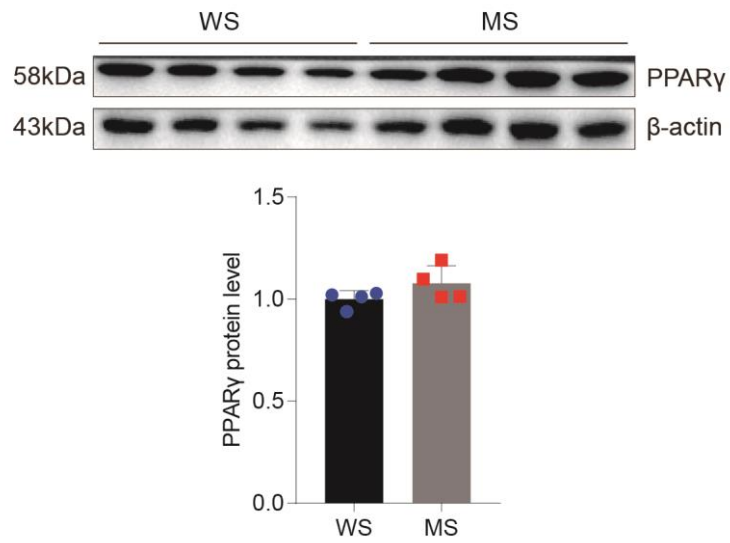

**Figure S7. Western blotting (up) and protein gray value (down) of PPAR $\gamma$  in eWAT of WS and MS mice on a HFD for 12 weeks. Related to Figure 8.**

n = 4/group. Data are represented as mean  $\pm$  SD. Statistical analysis was carried out by Student's t test.



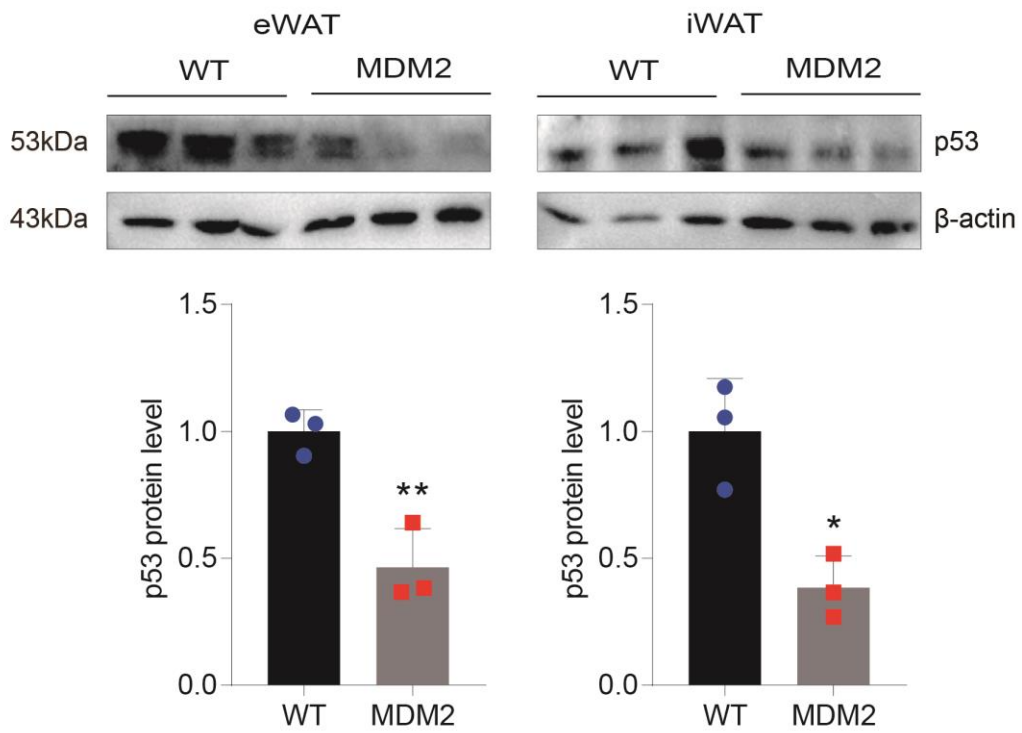

**Figure S8. Western blotting (up) and protein gray value (down) of p53 in eWAT (left) and iWAT (right) of WT and *Mdm2*-AKI mice on a HFD for 12 weeks. Related to Figure 7.**

n = 3/group. Data are represented as mean  $\pm$  SD. Statistical analysis was carried out by Student's t test. \* p < 0.05 and \*\* p < 0.01.

## Supplementary Tables

Table S1 Combining analysis proteomics and ubiquitinomics. Related to Figure 6.

| Protein accession | Gene name        | Downregulation Ratio | Ubiquitin Modified Upregulation Position |
|-------------------|------------------|----------------------|------------------------------------------|
| Q9D2R0            | <i>Aacs</i>      | 0.242                | 24                                       |
| Q61285            | <i>Abcd2</i>     | 0.619                | 615                                      |
| Q9WTQ5            | <i>Akap12</i>    | 0.486                | 164                                      |
| O70423            | <i>Aoc3</i>      | 0.604                | 596                                      |
| O54754            | <i>Aox1</i>      | 0.641                | 1103                                     |
| Q63918            | <i>Cavin2</i>    | 0.582                | 156                                      |
| Q9DB34            | <i>Chmp2a</i>    | 0.639                | 9                                        |
| P56198            | <i>Cidec</i>     | 0.577                | 6, 112, 115, 180, 236                    |
| P56395            | <i>Cyb5a</i>     | 0.57                 | 39                                       |
| P56387            | <i>Dynlt3</i>    | 0.572                | 63                                       |
| Q3TGW2            | <i>Eepd1</i>     | 0.631                | 156                                      |
| P54310            | <i>Lipe</i>      | 0.664                | 323                                      |
| P26645            | <i>Marcks</i>    | 0.472                | 11, 30, 40                               |
| Q61753            | <i>Phgdh</i>     | 0.465                | 21, 384                                  |
| Q8BJ56            | <i>Pnpla2</i>    | 0.594                | 92                                       |
| P31324            | <i>Prkar2b</i>   | 0.626                | 174, 202, 285, 370                       |
| Q99K85            | <i>Psat1</i>     | 0.633                | 323                                      |
| Q9ET01            | <i>Pygl</i>      | 0.665                | 618                                      |
| P07758            | <i>Serpina1a</i> | 0.443                | 186                                      |
| P22599            | <i>Serpina1b</i> | 0.517                | 292                                      |
| P82347            | <i>Sgcd</i>      | 0.554                | 23                                       |
| P51912            | <i>Slc1a5</i>    | 0.53                 | 7, 384, 502, 534                         |
| Q9Z0F7            | <i>Sncg</i>      | 0.463                | 23, 110, 119                             |
| Q923B6            | <i>Steap4</i>    | 0.658                | 18, 97, 161                              |

**Table S2 Primers of plasmids construction for Co-Immunoprecipitation and In vitro ubiquitination assay. Related to Plasmid construction in STAR Methods.**

| <b>Plasmids</b>              | <b>Forward primer(5'---3')</b>     | <b>Reverse primer(5'---3')</b>     |
|------------------------------|------------------------------------|------------------------------------|
| pEGFP-C1                     | ATTCTGCAGTCGACGGTACC               | TAGATCCGGTGGATCCTTAA               |
| -STEAP4                      | GAGAAAGCACATGCA                    | ATATCCGATT                         |
| pCMV3-myc<br>-mSTEAP4        | GCCGCCACCAAGCTTGGTA                | GAATTCGGCGGCCGCTCTAG               |
| pCMV3-myc<br>-mSTEAP4(K18R)  | CTGATTCCTCAGAAAGGCAA<br>GGGGTTGTC  | GACAACCCCTTGCCTTTCTG<br>AGGAATCAG  |
| pCMV3-myc<br>-mSTEAP4(K97R)  | CTAGTTGATTATCTCAGAGG<br>AAAAGTATTG | CAATACTTTTCCTCTGAGATA<br>ATCAACTAG |
| pCMV3-myc<br>-mSTEAP4(K161R) | GTGGAAATGACAGCAGGG<br>CCAAACAAAGAG | CTCTTTGTTTGGCCCTGCTG<br>TCATTTCCAC |

**Table S3 The qPCR primers. Related to Quantitative RT-PCR in STAR Methods.**

| <b>Gene name</b> | <b>Forward primer (5'---3')</b> | <b>Reverse primer(5'---3')</b> |
|------------------|---------------------------------|--------------------------------|
| <i>actin</i>     | CCAGCCTTCCTTCTTGGGTAT           | TGCTGGAAGGTGGACAGTGAG          |
| <i>Mdm2</i>      | CATGTCTGTGTCTACCGAGGG           | TAAGTGTCGTTTTGCGCTCC           |
| <i>p21</i>       | TAAGGACGTCCCACTTTGCC            | GACAACGGCACACTTTGCTC           |
| <i>Bax</i>       | GCGTGGTTGCCCTCTTCTACTTTG        | AGTCCAGTGTCCAGCCCATGATG        |
| <i>Bcl2</i>      | TGAGTACCTGAACCGGCATCT           | GCATCCCAGCCTCCGTTAT            |
| <i>Tnfa</i>      | CGTCAGCCGATTTGCTATCT            | CGGACTCCGCAAAGTCTAAG           |
| <i>Il-6</i>      | AGTTGCCTTCTTGGGACTGA            | TCCACGATTTCCAGAGAAC            |
